# Supplementary material for: In Vitro 3D Staphylococcus aureus Abscess Communities Induce Bone Marrow Cells to Expand into Myeloid-Derived Suppressor Cells
Source: MDPI journal article supplement (doi:10.3390/pathogens10111446), 2021-11-06
Supplement: s1 [file s1]

**Table S1.** Proteomics of murine positive control and SAC-exposed bone marrow cultures in comparison to negative control bone marrow cells. Significantly differently expressed proteins are in bold.

| ANALYTE | Positive control |          |          |                 | <i>S. aureus</i> SACs |          |          |                 |
|---------|------------------|----------|----------|-----------------|-----------------------|----------|----------|-----------------|
|         | NPX              | Min      | Max      | p-value         | NPX                   | Min      | Max      | p-value         |
| ACVRL1  | 0.080198         | -0.10633 | 0.266722 | 0.53909         | 0.506429              | 0.319904 | 0.692953 | <b>1.51E-06</b> |
| ADAM23  | -0.01126         | -0.33606 | 0.313531 | 0.995875        | 0.057263              | -0.26753 | 0.382057 | 0.899103        |
| AHR     | 0.519393         | 0.118256 | 0.920531 | <b>0.009555</b> | 0.420159              | 0.019021 | 0.821296 | <b>0.038837</b> |
| APBB1P  | -0.0693          | -0.34946 | 0.210868 | 0.811916        | 0.034648              | -0.24552 | 0.314813 | 0.948893        |
| AXIN1   | 0.093668         | -0.14632 | 0.333658 | 0.599518        | 0.106194              | -0.1338  | 0.346185 | 0.520293        |
| CA13    | 0.188117         | -0.22917 | 0.605408 | 0.507943        | 0.138142              | -0.27915 | 0.555433 | 0.690413        |
| CANT1   | -0.0036          | -0.32141 | 0.314206 | 0.999559        | 0.31755               | -0.00026 | 0.635356 | 0.050212        |
| CASP3   | 0.162021         | -0.34083 | 0.664871 | 0.703805        | 1.607817              | 1.104966 | 2.110667 | <b>9.60E-08</b> |
| CCL2    | 8.81005          | 8.017551 | 9.602549 | <b>2.10E-14</b> | 9.148914              | 8.356415 | 9.941414 | <b>2.10E-14</b> |
| CCL20   | 0.026476         | -0.31521 | 0.368161 | 0.979587        | 0.36247               | 0.020785 | 0.704155 | <b>0.03612</b>  |
| CCL3    | 5.38239          | 4.80773  | 5.95705  | <b>2.11E-14</b> | 9.413543              | 8.838884 | 9.988203 | <b>2.10E-14</b> |
| CCL5    | -0.05182         | -0.40103 | 0.297393 | 0.927331        | 2.184746              | 1.835534 | 2.533957 | <b>1.55E-13</b> |
| CDH6    | -0.00492         | -0.1965  | 0.186668 | 0.997737        | 0.049103              | -0.14248 | 0.240689 | 0.799667        |
| CLMP    | 0.10242          | -0.24738 | 0.452218 | 0.747615        | 0.04704               | -0.30276 | 0.396838 | 0.93988         |
| CLSTN2  | 0.083914         | -0.26573 | 0.433555 | 0.821784        | 0.205938              | -0.1437  | 0.555578 | 0.322245        |
| CNTN1   | -0.00673         | -0.52663 | 0.513157 | 0.999423        | 2.099522              | 1.579631 | 2.619413 | <b>1.23E-09</b> |
| CNTN4   | -0.0538          | -0.58783 | 0.480234 | 0.965765        | 2.014092              | 1.480063 | 2.548122 | <b>4.61E-09</b> |
| CPE     | 0.117222         | -0.12702 | 0.361461 | 0.465457        | 0.124439              | -0.1198  | 0.368677 | 0.423963        |
| CRIM1   | 0.904332         | 0.541812 | 1.266853 | <b>5.66E-06</b> | 1.319222              | 0.956702 | 1.681743 | <b>9.08E-09</b> |
| CSF2    | 12.41882         | 11.65896 | 13.17868 | <b>2.10E-14</b> | 1.680909              | 0.921049 | 2.440769 | <b>3.21E-05</b> |
| CXCL1   | 0.495879         | -0.38927 | 1.381028 | 0.357239        | 8.059759              | 7.17461  | 8.944908 | <b>2.11E-14</b> |
| CXCL9   | 0.161654         | -0.36769 | 0.690995 | 0.72902         | 0.587522              | 0.058182 | 1.116863 | <b>0.027592</b> |
| CYR61   | 0.174816         | -0.17844 | 0.528071 | 0.444285        | 0.385834              | 0.032579 | 0.73909  | 0.051           |
| DCTN2   | -0.14064         | -0.49816 | 0.216891 | 0.59482         | 0.088564              | -0.26896 | 0.446092 | 0.811418        |
| DDAH1   | 0.2086           | -0.04211 | 0.459306 | 0.115792        | 0.668212              | 0.417506 | 0.918918 | <b>2.03E-06</b> |
| DLK1    | 0.025326         | -0.56809 | 0.618744 | 0.993759        | 2.261857              | 1.668439 | 2.855275 | <b>3.77E-09</b> |
| DLL1    | -0.05614         | -0.44964 | 0.337354 | 0.93261         | 1.280693              | 0.887197 | 1.67419  | <b>7.01E-08</b> |
| EDA2R   | 0.134764         | -0.05114 | 0.320672 | 0.187645        | 0.163271              | -0.02264 | 0.349179 | 0.092779        |
| ENO2    | 0.102199         | -0.16202 | 0.36642  | 0.604902        | 0.312828              | 0.048607 | 0.577049 | <b>0.018189</b> |
| EPCAM   | 0.086451         | -0.4128  | 0.585706 | 0.902476        | 2.609799              | 2.110544 | 3.109054 | <b>6.37E-12</b> |
| EPO     | 0.031233         | -0.12164 | 0.184105 | 0.867108        | 0.054049              | -0.09882 | 0.20692  | 0.656011        |
| ERBB4   | -0.06824         | -0.33292 | 0.196436 | 0.79755         | 0.285387              | 0.020708 | 0.550065 | <b>0.032852</b> |
| FAS     | 0.61854          | 0.093644 | 1.143436 | <b>0.018774</b> | 0.806113              | 0.281217 | 1.33101  | <b>0.002221</b> |
| FLI1    | -0.00022         | -0.29004 | 0.289609 | 0.999998        | 0.151759              | -0.13807 | 0.441583 | 0.404773        |
| FLRT2   | 0.05412          | -0.37678 | 0.485023 | 0.947334        | 0.131029              | -0.29987 | 0.561932 | 0.730964        |
| FOXO1   | -0.00503         | -0.27401 | 0.263956 | 0.998801        | 0.09932               | -0.16966 | 0.368301 | 0.631898        |
| FST     | 0.815567         | 0.438595 | 1.192539 | <b>4.34E-05</b> | 0.587228              | 0.210256 | 0.9642   | <b>0.001938</b> |
| FSTL3   | -0.02648         | -0.2431  | 0.190139 | 0.950036        | 0.579132              | 0.362515 | 0.79575  | <b>1.93E-06</b> |
| GCG     | 0.03534          | -0.2574  | 0.328082 | 0.951235        | 0.016187              | -0.27656 | 0.308929 | 0.989548        |

|           |          |          |          |                 |          |          |          |                 |
|-----------|----------|----------|----------|-----------------|----------|----------|----------|-----------------|
| GDNF      | 0.170066 | -0.13813 | 0.478262 | 0.367873        | 0.108646 | -0.19955 | 0.416842 | 0.657604        |
| GFRA1     | -0.02679 | -0.31688 | 0.263294 | 0.97113         | 0.413452 | 0.123364 | 0.703541 | <b>0.004371</b> |
| GHRL      | 0.0107   | -0.23806 | 0.259458 | 0.99366         | 0.164297 | -0.08446 | 0.413054 | 0.245085        |
| HGF       | 0.196818 | -0.08861 | 0.482241 | 0.21774         | 0.365352 | 0.079929 | 0.650776 | <b>0.010423</b> |
| IGSF3     | -0.06644 | -0.33758 | 0.204706 | 0.815058        | -0.02151 | -0.29266 | 0.249628 | 0.978608        |
| IL10      | -0.06541 | -0.49268 | 0.36185  | 0.922842        | 2.157867 | 1.730602 | 2.585131 | <b>1.32E-11</b> |
| IL17A     | -0.01264 | -0.39992 | 0.374638 | 0.996344        | 0.573626 | 0.186346 | 0.960905 | <b>0.003108</b> |
| IL17F     | -0.02632 | -0.27593 | 0.223292 | 0.962557        | 0.20612  | -0.04349 | 0.455732 | 0.119267        |
| IL1A      | 4.194051 | 3.4792   | 4.908902 | <b>5.53E-13</b> | 4.300574 | 3.585724 | 5.015425 | <b>3.31E-13</b> |
| IL1B      | 0.065698 | -0.25462 | 0.386018 | 0.866158        | 0.443    | 0.122679 | 0.763321 | <b>0.005646</b> |
| IL23R     | -0.04612 | -0.36224 | 0.270005 | 0.929666        | 0.142314 | -0.17381 | 0.458436 | 0.508855        |
| IL5       | -0.15824 | -0.4759  | 0.159417 | 0.439694        | -0.14442 | -0.46208 | 0.173235 | 0.502263        |
| IL6       | 4.927272 | 3.871304 | 5.98324  | <b>6.80E-11</b> | 1.640776 | 0.584807 | 2.696744 | <b>0.001986</b> |
| ITGB1BP2  | 0.076324 | -0.19914 | 0.351791 | 0.770417        | 0.018151 | -0.25732 | 0.293617 | 0.985192        |
| ITGB6     | -0.13787 | -0.44078 | 0.165038 | 0.501518        | 0.082794 | -0.22011 | 0.385701 | 0.775762        |
| KITLG     | 0.014881 | -0.3258  | 0.355562 | 0.993463        | 0.816732 | 0.476052 | 1.157413 | <b>1.02E-05</b> |
| LGMN      | 0.353468 | 0.177983 | 0.528953 | <b>0.000111</b> | 0.309749 | 0.134264 | 0.485234 | <b>0.000531</b> |
| LPL       | 1.049864 | 0.825866 | 1.273862 | <b>6.20E-11</b> | 0.209558 | -0.01444 | 0.433556 | 0.069765        |
| MAP2K6    | 0.133862 | -0.06013 | 0.327856 | 0.217319        | -0.02418 | -0.21818 | 0.169811 | 0.948094        |
| MATN2     | 0.221934 | -0.29886 | 0.74273  | 0.544843        | 2.661233 | 2.140438 | 3.182029 | <b>1.03E-11</b> |
| MIA       | -0.19875 | -0.70371 | 0.306221 | 0.594476        | 0.504191 | -0.00078 | 1.009159 | 0.050406        |
| NADK      | 0.147844 | -0.42201 | 0.717694 | 0.79531         | 0.851318 | 0.281468 | 1.421168 | <b>0.002873</b> |
| NOTCH3    | 0.089583 | -0.24539 | 0.424555 | 0.784122        | 0.826023 | 0.491052 | 1.160995 | <b>6.73E-06</b> |
| NTF3      | 0.025131 | -0.2445  | 0.294765 | 0.970612        | 0.155987 | -0.11365 | 0.425621 | 0.334743        |
| PAK4      | 0.092524 | -0.20802 | 0.393066 | 0.72534         | 0.336746 | 0.036204 | 0.637287 | <b>0.026021</b> |
| PARP1     | -0.58837 | -1.09156 | -0.08519 | <b>0.019772</b> | 0.047144 | -0.45604 | 0.550328 | 0.970309        |
| PDGFB     | 0.037697 | -0.15819 | 0.233584 | 0.881089        | 0.525714 | 0.329827 | 0.721602 | <b>1.82E-06</b> |
| PLA2G4A   | 0.348788 | -0.00185 | 0.699426 | 0.051406        | 0.155657 | -0.19498 | 0.506295 | 0.518162        |
| PLIN1     | 0.34824  | 0.068069 | 0.628411 | <b>0.012947</b> | 0.224896 | -0.05528 | 0.505066 | 0.132754        |
| PLXNA4    | 0.008657 | -0.34264 | 0.359954 | 0.997915        | 0.210167 | -0.14113 | 0.561464 | 0.311453        |
| PPP1R2    | 0.165978 | -0.27827 | 0.610226 | 0.625172        | 0.334666 | -0.10958 | 0.778913 | 0.165831        |
| PRDX5     | -2.78212 | -4.5173  | -1.04694 | <b>0.00146</b>  | -1.60032 | -3.33551 | 0.134857 | 0.074592        |
| QDPR      | 0.04046  | -0.23112 | 0.312042 | 0.926772        | 0.15402  | -0.11756 | 0.425602 | 0.348649        |
| RGMA      | -0.09465 | -0.57274 | 0.383433 | 0.874636        | 1.706359 | 1.228274 | 2.184444 | <b>1.30E-08</b> |
| RIOX2     | 1.541017 | 1.083306 | 1.998727 | <b>3.81E-08</b> | 0.397518 | -0.06019 | 0.855228 | 0.097281        |
| S100A4    | 0.341681 | -0.15354 | 0.836906 | 0.217391        | -0.15743 | -0.65265 | 0.337795 | 0.710301        |
| SEZ6L2    | 0.032767 | -0.12533 | 0.190868 | 0.863556        | 0.055233 | -0.10287 | 0.213335 | 0.66246         |
| SNAP29    | 1.545736 | 1.041776 | 2.049695 | <b>1.98E-07</b> | 0.750219 | 0.246259 | 1.254178 | <b>0.002968</b> |
| TGFA      | 0.196557 | 0.042878 | 0.350235 | <b>0.010486</b> | 0.12057  | -0.03311 | 0.274249 | 0.144228        |
| TGFB1     | 0.188951 | -0.03432 | 0.412218 | 0.108228        | 0.50146  | 0.278194 | 0.724726 | <b>2.60E-05</b> |
| TGFBR3    | -0.05662 | -0.60453 | 0.491283 | 0.964004        | 3.022201 | 2.474295 | 3.570107 | <b>2.03E-12</b> |
| TNF       | 0.58382  | 0.203859 | 0.963781 | <b>0.00221</b>  | 3.800423 | 3.420462 | 4.180385 | <b>2.10E-14</b> |
| TNFRSF11B | -0.02754 | -0.37662 | 0.321545 | 0.978854        | 0.788291 | 0.439211 | 1.137371 | <b>2.41E-05</b> |
| TNFRSF12A | -0.01848 | -0.28914 | 0.252186 | 0.984115        | 0.029839 | -0.24082 | 0.300502 | 0.959149        |
| TNFSF12   | 0.232146 | -0.16932 | 0.633615 | 0.335071        | 1.004083 | 0.602614 | 1.405552 | <b>5.44E-06</b> |

|                |          |          |          |                 |          |          |          |                 |
|----------------|----------|----------|----------|-----------------|----------|----------|----------|-----------------|
| <b>TNNI3</b>   | 0.40275  | -0.14408 | 0.949576 | 0.178473        | 0.30913  | -0.2377  | 0.855956 | 0.350884        |
| <b>TNR</b>     | 0.053999 | -0.21613 | 0.324123 | 0.872368        | 0.142816 | -0.12731 | 0.41294  | 0.397983        |
| <b>TPP1</b>    | 0.102314 | -0.25834 | 0.462969 | 0.760883        | 1.05846  | 0.697806 | 1.419114 | <b>4.21E-07</b> |
| <b>VEGFD</b>   | -0.12666 | -0.43677 | 0.183461 | 0.571776        | 0.5082   | 0.198084 | 0.818316 | <b>0.001171</b> |
| <b>VSIG2</b>   | 0.837719 | 0.557565 | 1.117873 | <b>3.83E-07</b> | 0.483447 | 0.211657 | 0.755236 | <b>0.000513</b> |
| <b>WFIKKN2</b> | 0.156774 | -0.08696 | 0.400506 | 0.2624          | 0.463532 | 0.219801 | 0.707263 | <b>0.000224</b> |
| <b>WISP1</b>   | -0.0803  | -0.44002 | 0.279424 | 0.843672        | 0.229236 | -0.13049 | 0.588957 | 0.268587        |
| <b>YES1</b>    | -0.06831 | -0.37288 | 0.236261 | 0.842321        | 0.003289 | -0.30128 | 0.307858 | 0.999599        |
